# Supplementary material for: Isolation of proton transfer complexes containing 4-picolinium as cation and pyridine-2,6-dicarboxylate complex as anion: crystallographic and spectral investigations, antioxidant activities and molecular docking studies
Source: Royal Society of Chemistry journal article supplement (doi:10.1039/c5ra25939h), 2016-01-01
Supplement: c5ra25939h1.pdf [file c5ra25939h1.pdf]

Supporting Information

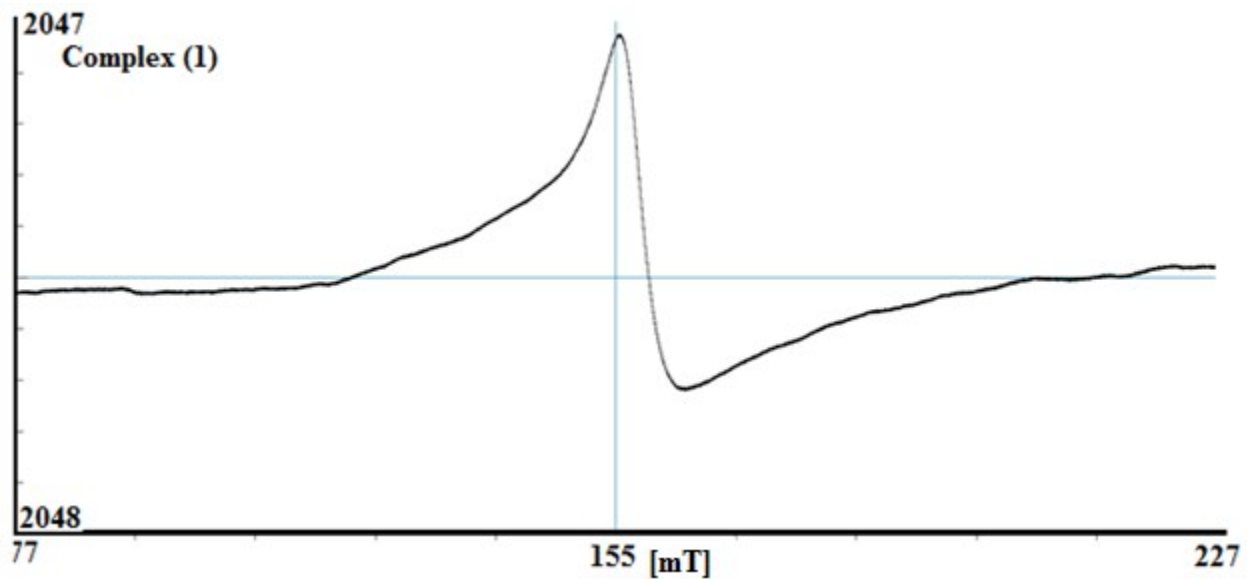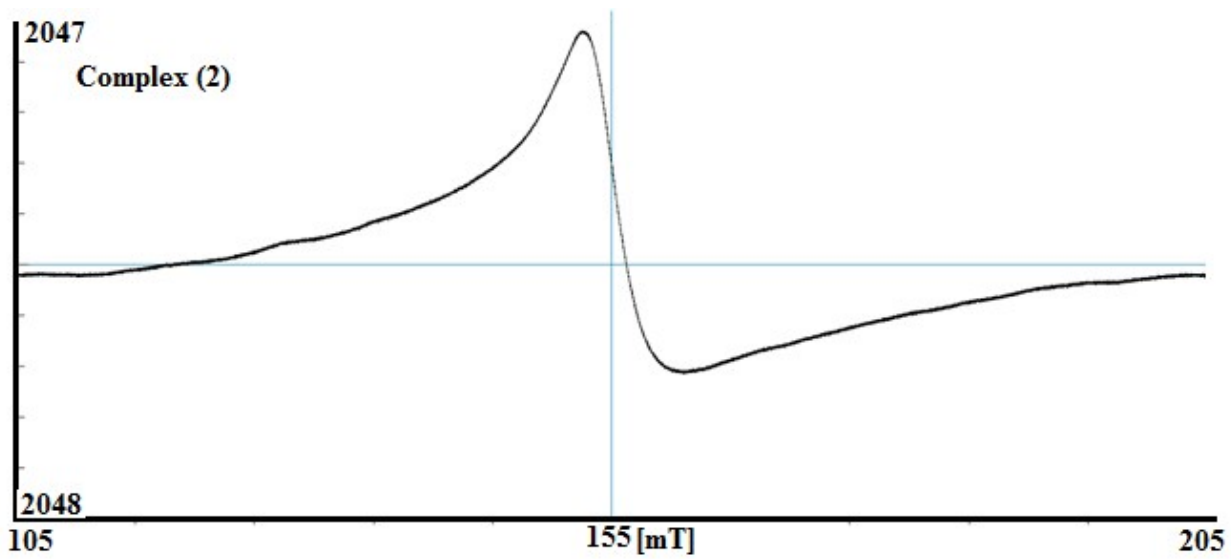

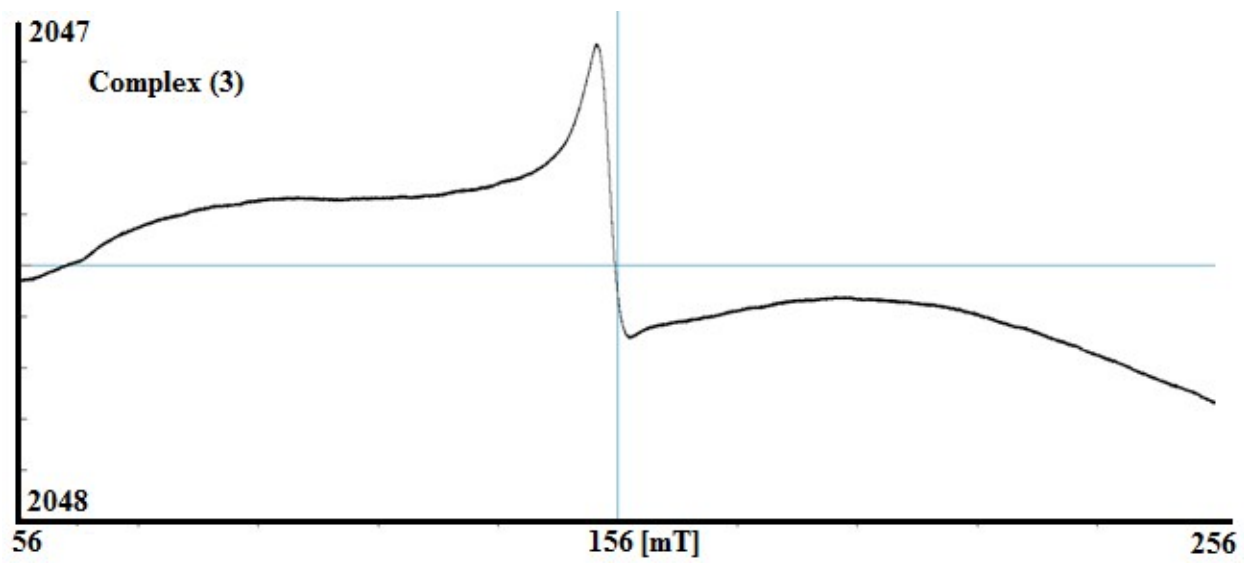

**Fig. 1S.** EPR spectra of the complexes 1-3.

**Table 1S**

Electronic transitions with their assignments

| Complexes                                                               | Band positions (cm <sup>-1</sup> ) | Assignments                                                                                               |
|-------------------------------------------------------------------------|------------------------------------|-----------------------------------------------------------------------------------------------------------|
| [4-Pic-H][Cr(pda) <sub>2</sub> ] $\cdot$ 2H <sub>2</sub> O ( <b>1</b> ) | 37453                              | n $\rightarrow$ $\pi^*$                                                                                   |
|                                                                         | 32120                              | $\pi \rightarrow \pi^*$                                                                                   |
|                                                                         | 29247                              | CT                                                                                                        |
|                                                                         | 23007                              | <sup>4</sup> T <sub>1g</sub> (F) $\leftarrow$ <sup>4</sup> A <sub>2g</sub>                                |
|                                                                         | 22306                              | <sup>4</sup> T <sub>2g</sub> (F) $\leftarrow$ <sup>4</sup> A <sub>2g</sub>                                |
| [4-Pic-H][Fe(pda) <sub>2</sub> ] $\cdot$ 2H <sub>2</sub> O ( <b>2</b> ) | 37594                              | n $\rightarrow$ $\pi^*$                                                                                   |
|                                                                         | 30030                              | $\pi \rightarrow \pi^*$                                                                                   |
|                                                                         | 26110                              | CT                                                                                                        |
|                                                                         | 16920                              | <sup>4</sup> T <sub>2g</sub> $\leftarrow$ <sup>6</sup> A <sub>1g</sub>                                    |
|                                                                         | 14286                              | [ <sup>4</sup> T <sub>2g</sub> , <sup>4</sup> T <sub>1g</sub> ] $\leftarrow$ <sup>6</sup> A <sub>1g</sub> |
| [4-Pic-H][Co(pda) <sub>2</sub> ] $\cdot$ 2H <sub>2</sub> O ( <b>3</b> ) | 37594                              | n $\rightarrow$ $\pi^*$                                                                                   |
|                                                                         | 30120                              | $\pi \rightarrow \pi^*$                                                                                   |
|                                                                         | 26178                              | CT                                                                                                        |
|                                                                         | 16949                              | <sup>1</sup> E <sub>1g</sub> $\leftarrow$ <sup>1</sup> A <sub>1g</sub> (F)                                |
|                                                                         | 14286                              | <sup>1</sup> A <sub>2g</sub> $\leftarrow$ <sup>1</sup> A <sub>1g</sub>                                    |
